1  
2  
3  
4  
5  
6  
7  
8  
9  
10  
11  
12  
13  
14  
15  
16  
17

A copy number variant is associated with a spectrum of pigmentation patterns in  
the rock pigeon (*Columba livia*)

Rebecca Bruders<sup>1</sup>, Hannah Van Hollebeke<sup>1</sup>, E.J. Osborne<sup>2</sup>, Zev Kronenberg<sup>2</sup>, Mark Yandell<sup>2</sup>,  
Michael D. Shapiro<sup>1,\*</sup>

<sup>1</sup> School of Biological Sciences, University of Utah, Salt Lake City, Utah, United States of  
America

<sup>2</sup> Department of Human Genetics, University of Utah, Salt Lake City, Utah, United States of  
America

\* Corresponding author  
Email: [mike.shapiro@utah.edu](mailto:mike.shapiro@utah.edu)

## 18 **ABSTRACT**

19           Rock pigeons (*Columba livia*) display an extraordinary array of pigment pattern variation.  
20    One such pattern, Almond, is characterized by a variegated patchwork of plumage colors that are  
21    distributed in an apparently random manner. Almond is a sex-linked, semi-dominant trait  
22    controlled by the classical *Stripper* (*St*) locus. Heterozygous males ( $Z^{St}Z^{+}$  sex chromosomes) and  
23    hemizygous Almond females ( $Z^{St}W$ ) are favored by breeders for their attractive plumage. In  
24    contrast, homozygous Almond males ( $Z^{St}Z^{St}$ ) develop severe eye defects and lack all plumage  
25    pigmentation, suggesting that higher dosage of the mutant allele is deleterious. To determine the  
26    molecular basis of Almond, we compared the genomes of Almond pigeons to non-Almond pigeons  
27    and identified a candidate *St* locus on the Z chromosome. We found a copy number variant (CNV)  
28    within the differentiated region that captures complete or partial coding sequences of four genes,  
29    including the melanosome maturation gene *Mlana*. We did not find fixed coding changes in genes  
30    within the CNV, but all genes are misexpressed in regenerating feather bud collar cells of Almond  
31    birds. Notably, six other alleles at the *St* locus are associated with depigmentation phenotypes, and  
32    all exhibit expansion of the same CNV. Structural variation at *St* is linked to diversity in plumage  
33    pigmentation and gene expression, and thus provides a potential mode of rapid phenotypic  
34    evolution in pigeons.

35

## 36 **AUTHOR SUMMARY**

37           The genetic changes responsible for different animal color patterns are poorly understood,  
38    due in part to a paucity of research organisms that are both genetically tractable and phenotypically  
39    diverse. Domestic pigeons (*Columba livia*) have been artificially selected for many traits,  
40    including an enormous variety of color patterns that are variable both within and among different

41 breeds of this single species. We investigated the genetic basis of a sex-linked color pattern in  
42 pigeons called Almond that is characterized by a sprinkled pattern of plumage pigmentation.  
43 Pigeons with one copy of the Almond allele have desirable color pattern; however, male pigeons  
44 with two copies of the Almond mutation have severely depleted pigmentation and congenital eye  
45 defects. By comparing the genomes of Almond and non-Almond pigeons, we discovered that  
46 Almond pigeons have extra copies of a chromosome region that contains a gene that is critical for  
47 the formation of pigment granules. We also found that different numbers of copies of this region  
48 are associated with varying degrees of pigment reduction. The Almond phenotype in pigeons bears  
49 a remarkable resemblance to Merle coat color mutants in dogs, and our new results from pigeons  
50 suggest that similar genetic mechanisms underlie these traits in both species. Our work highlights  
51 the role of gene copy number variation as a potential driver of rapid phenotypic evolution.

52

## 53 **INTRODUCTION**

54 In natural populations of animals, pigment colors and patterns impact mate choice,  
55 signaling, mimicry, crypsis, and distraction of predators [1, 2]. In domestic animals, pigmentation  
56 traits are often selected by humans based on colors and patterns they find most attractive. Despite  
57 longstanding interest in the spectacular variation in color and pattern among animals, we know  
58 little about the molecular mechanisms that mediate color patterns. Understanding the genetic basis  
59 of the stunning array of animal color patterns benefits from the study of genetically tractable  
60 species; however, progress is hampered, in part, by a limited number of traditional model  
61 organisms that show limited variation in color and color patterning.

62 The domestic rock pigeon (*Columba livia*) is a striking example of variation shaped by  
63 artificial selection, with a multitude of colors and color patterns within and among more than 350

64 breeds. Because breeds of domestic pigeon belong to the same species and are interfertile, pigeons  
65 offer an exceptional opportunity to understand the genetic basis of pigmentation traits using  
66 laboratory crosses and genomic association studies [3]. Previously, we identified several genes  
67 involved in determining the type and intensity of plumage melanins in pigeons [4, 5], but  
68 considerably less is known about the molecular determinants of pattern deposition [6]. The  
69 molecular basis of pattern variation is an exciting frontier in pigmentation genetics, and recent  
70 work in other vertebrates reveals several genes that contribute to this process. Still, the genetic  
71 basis of pigment pattern is decidedly less well understood than the genes controlling pigment types  
72 [7–16].

73         The classical pigmentation pattern in *C. livia* known as Almond is caused by a semi-  
74 dominant mutation (*St* allele) at the sex-linked *Stipper* (*St*) locus [17] (Fig. 1). Unlike most other  
75 pigmentation pattern traits in pigeons, the variegated or sprinkled patchwork of plumage colors in  
76 Almond is apparently random within and among individuals [18]. Furthermore, the color pattern  
77 changes in an unpredictable manner with each molt [19–21]. The number of pigmented feathers in  
78 Almond pigeons also increases with each successive molt, and this effect is more pronounced in  
79 males [22, 23]. Notably, this phenomenon is the opposite of what is typically observed with  
80 pigmentation traits that change throughout the lifespan of an individual, such as vitiligo and  
81 graying, which result in a decrease in pigment over time [24–28]. In addition to Almond, at least  
82 six other alleles at *St* lead to varying degrees of depigmentation in pigeons, suggesting that the *St*  
83 locus might be a mutational hotspot [21, 29].

84         Heterozygous Almond males ( $Z^{St}Z^+$ ) and hemizygous Almond females ( $Z^{St}W$ ; males are  
85 the homogametic sex in birds), each of which have one copy of the *St* allele, are valued by breeders  
86 for their attractive color patterns. However, homozygous Almond males ( $Z^{St}Z^{St}$ ) almost always

87 lack pigmentation in the first set of pennaceous feathers and have severe congenital eye defects  
88 [19, 30, 31] (Fig. 1B, C). The pattern of inheritance of Almond suggests that dosage of the mutant  
89 allele, rather than absence of the wild type allele, is responsible for the pigment and eye phenotypes  
90 in homozygous males. Eye defects are also associated with pigmentation traits in other vertebrate  
91 species, including dogs and horses, yet the molecular basis of these linked effects remains poorly  
92 understood [9, 32–37]. Therefore, Almond pigeons can illuminate links between pigmentation and  
93 eye defects, including whether pleiotropic effects of a single gene or linked genes with separate  
94 effects control these correlated traits.

95         In this study, we investigate the genomic identity of the *St* locus in domestic pigeons.  
96 Whole-genome sequence comparisons of Almond and non-Almond birds reveal a copy number  
97 variant (CNV) in Almond birds that includes the complete coding sequences of two genes, and  
98 partial coding sequences of two others. One of the complete genes, *Mlana*, plays a key role in the  
99 development of the melanosome (the organelle in which pigment granules are produced), making  
100 it a strong candidate for the pigmentation phenotype observed in Almond pigeons. We also find  
101 that different alleles at *St* are correlated with different degrees of expansion of the same CNV,  
102 thereby linking a spectrum of pigmentation variants to changes at one locus.

103

## 104 **RESULTS**

### 105 **A sex-linked genomic region is associated with Almond pigmentation pattern**

106         To determine the genomic location of the sex-linked *St* locus, we compared the genomes  
107 of 12 Almond pigeons to a panel of 109 non-Almond pigeons from a diverse set of breeds, using  
108 a probabilistic measure of allele frequency differentiation (pFst) [38] (see S1 Table for sample  
109 details). This whole-genome scan identified several significantly differentiated regions, but one

110 exceeded the others by several orders of magnitude and was located on a Z-chromosome scaffold  
111 (ScoHet5\_227), as predicted from classical genetics studies (Fig. 2A). The differentiated region of  
112 ScoHet5\_227 (position 5,186,219-5,545,482; peak SNP,  $p=1.1 \times 10^{-16}$ , genome wide significance  
113 threshold  $p = 5.5 \times 10^{-10}$ ) contained eight annotated protein-coding genes, none of which had fixed  
114 coding changes in Almond compared to non-Almond genomes (VAAST [39]). Therefore, the  
115 Almond pigmentation pattern probably does not result from non-synonymous changes to protein-  
116 coding genes.

117 Several other scaffolds contained sequences that were significantly differentiated between  
118 Almond and non-Almond pigeons (Fig. 2A). All of these regions are autosomal, and we speculate  
119 that they are linked to other color traits that are often co-selected with Almond to give the most  
120 desirable sprinkled patchwork of colors, including T-check (a highly melanistic wing pattern), kite  
121 bronze (a deep reddening of the feathers), and recessive red (a pheomelanic color trait) [18, 21,  
122 29]. However, because Almond is a sex-linked trait [17], we focused our attention on the Z-linked  
123 scaffold ScoHet5\_227.

124

### 125 **A copy number variant is associated with the Almond pigment pattern**

126 In the absence of fixed coding changes between Almond and non-Almond birds, we next  
127 asked if birds with different phenotypes had genomic structural differences in the candidate region.  
128 We examined sequencing coverage on ScoHet5\_227 and found that all 12 Almond genomes had  
129 substantially higher coverage in the Almond candidate region relative to non-Almond genomes,  
130 indicating the presence of a copy number variant (CNV) (Fig. 2B, C). The CNV captures a 77-kb  
131 segment of the reference genome (ScoHet5\_227: 5,181,467-5,259,256), with an additional  
132 increase in coverage in a nested 25-kb segment (ScoHet5\_227: 5,201,091-5,226,635). Read-depth

133 analysis confirmed 7 copies of the outer 77-kb segment and 14 copies of the inner 25-kb segment  
134 in the genomes of female ( $Z^{St}W$ ) Almond pigeons, which have an *St* locus on only one  
135 chromosome. We used PCR to amplify across the outer and inner CNV breakpoints of Almond  
136 pigeons and determined that the CNV consists of tandem repeats of the 77-kb and nested 25-kb  
137 segments (Fig. 3B).

138 We then genotyped the CNV region in a larger sample of Almond pigeons and found a  
139 significant association between the number of tandem repeats and the Almond phenotype (TaqMan  
140 assay; pairwise Wilcoxon test,  $p=2.0 \times 10^{-16}$ ). Almost all Almond birds have more than one copy of  
141 the CNV per Z-chromosome ( $n=78$  of 80) (Fig. 4). Conversely, nearly all non-Almond birds had  
142 only one copy per Z-chromosome ( $n=55$  of 57). The two non-Almond birds with  $>1$  copy per  
143 chromosome had a maximum of one additional copy of the CNV, indicating that small increases  
144 in copy number do not necessarily cause the Almond phenotype. Overall, these analyses suggest  
145 that expansion of CNV on ScoHet5\_227 is associated with the Almond phenotype.

146

#### 147 **Genes within the CNV are misexpressed in Almond feather buds**

148 We next asked if the CNV was associated with gene expression changes between  
149 developing Almond and non-Almond feathers. To address this question, we compared expression  
150 of genes in the CNV region among birds with ( $Z^{St}Z^+$ ,  $Z^{St}W$ ,  $Z^{St}Z^{St}$ ) and without ( $Z^+Z^+$  and  $Z^+W$ )  
151 Almond alleles. We analyzed Almond feather buds with dark and light pigmentation separately to  
152 assess whether expression differed between qualitatively different feather pigmentation types, both  
153 of which are present in  $Z^{St}Z^+$  and  $Z^{St}W$  Almond individuals. The CNV contains the complete  
154 coding sequences of two genes, *Mlana* and *Slc16a7*, and partial coding sequences of two additional  
155 genes, *Ermp1* and *Kiaa2026* (Fig. 3A). *Mlana* is predicted to have up to 14 total copies per  $Z^{St}$

156 chromosome based on sequencing coverage in  $Z^{St}W$  Almond birds (Fig. 3B). *Mlana* is expressed  
157 almost exclusively in melanocytes (melanin-producing cells), and encodes a protein that is critical  
158 for melanosome maturation through interactions with the matrix-forming protein Pmel [40–42].  
159 Thus, the combination of the biological role of *Mlana* and its location in the Almond CNV makes  
160 *Mlana* a strong candidate gene for the Almond phenotype.

161 Compared to non-Almond feather buds, *Mlana* expression is increased in dark feather  
162 buds, but not in light feather buds, from  $Z^{St}Z^+$  and  $Z^{St}W$  Almond birds or the unpigmented feather  
163 buds of homozygous Almond ( $Z^{St}Z^{St}$ ) birds (Fig. 5A; see S2 Table and S3 Table for raw data for  
164 all qRT-PCR experiments). We noticed that the variance of expression observed for *Mlana* in both  
165 dark and light Almond feather buds, though not statistically significant (Kolmogorov-Smirnov  
166 test), trends higher than in non-Almond samples. This data distribution might reflect the variability  
167 of the phenotype itself, which is characterized by different quantities and intensities of feather  
168 pigmentation both within and between  $Z^{St}Z^+$  and  $Z^{St}W$  Almond pigeons.

169 Other genes completely or partially within the CNV show increased expression in feathers  
170 from birds with at least one Almond allele relative to non-Almond birds. *Slc16a7* encodes a  
171 monocarboxylate transporter, and is predicted to be amplified to six full-length copies in Almond  
172 pigeons (Fig. 3B). We observed a 40-fold increase in expression of *Slc16a7* in Almond feather  
173 buds compared to non-Almond (Fig. 5A). *Slc16a7* is not known to be important in pigmentation;  
174 however, this gene is expressed in the mammalian, where it is involved in lactic acid transport and  
175 osmotic balance [43–47].

176 In addition to the two genes fully contained within the CNV, a novel fusion of *Ermp1* (a  
177 metallopeptidase gene) and *Kiaa2026* (unknown function) is predicted to span the outer CNV  
178 breakpoints (Fig. 3C). Neither gene is known to play a role in pigmentation or eye development.



179 The predicted *Ermp1/Kiaa2026* fusion protein is a truncated version of *Ermp1*, including the  
180 peptidase domain and 3 of the 6 transmembrane domains (Fig. 3B). The 22 amino acids from  
181 *Kiaa2026* at the C-terminus of the fusion protein do not include a known protein domain [48];  
182 thus, the fusion protein is unlikely to create a novel combination of functional domains. As  
183 expected, the *Ermp1/Kiaa2026* fusion gene is not expressed in feathers of non-Almond birds, but  
184 is expressed in birds with Almond alleles (Fig. 5A). When we analyzed the expression of the exons  
185 of *Kiaa2026* and *Ermp1* located outside the CNV, we did not observe expression differences  
186 among genotypes (Fig. 5B). Therefore, the Almond CNV is associated with expression of the novel  
187 fusion gene, but not with expression differences in the full-length transcripts of either contributing  
188 gene. Similarly, *Ric1*, a gene immediately outside the CNV, shows a modest (less than two-fold)  
189 expression increase in light Almond feathers relative to other feather types (Fig. 5B). In summary,  
190 genes inside CNV show variable or increased expression in feathers from Almond birds, whereas  
191 genes adjacent to the CNV show little or no expression change.

192

### 193 **Gene expression changes suggest melanocyte dysfunction in Almond feather buds**

194 Plumage pigmentation patterns in  $Z^{St}Z^{+}$ ,  $Z^{St}W$ , and  $Z^{St}Z^{St}$  Almond birds are radically  
195 different than non-Almond birds, which led us to predict that other components of the  
196 melanogenesis pathway might differ as well. The production of melanin by melanocytes is a multi-  
197 step process that begins with activation of several pathways, including Wnt and Mc1r signaling,  
198 via extracellular ligands and agonists [49–52]. Subsequently, expression of transcription factors,  
199 including *Mitf*, activates a genetic cascade that ultimately promotes the maturation of a functional  
200 melanocyte [53]. Within the melanocyte itself, a series of enzymatic reactions and assembly of the  
201 melanosome leads to the production and deposition of pigments. Melanosomes are then transferred

202 to skin cells and epidermal appendages, including feathers. In pigeons and other birds with  
203 melanin-based pigments, the balance of pheomelanin (reds, yellows) and eumelanin (blacks,  
204 browns) deposition determines plumage color [54].

205 To determine if pigment production signals diverge between Almond and non-Almond  
206 feather buds, we measured expression of several marker genes for melanocyte maturation and  
207 function by qRT-PCR. We first examined genes involved in melanocyte survival and  
208 differentiation, both of which are critical early events in melanin production. *Sox10*, which  
209 encodes a transcription factor that activates expression of many downstream genes including *Mitf*,  
210 *Tyrosinase*, and *Tyrp1* expression [55], is downregulated only in light Almond and homozygous  
211 Almond feather buds (Fig. 5B). Because *Sox10* regulates *Mitf* and other melanocyte genes, this  
212 result indicates that melanocyte dysfunction occurs early in the lightly pigmented Almond feathers,  
213 but not in dark Almond feathers. A second melanocyte differentiation and survival marker gene,  
214 *Mitf*, encodes a transcription factor that activates expression of *Tyrosinase*, *Tyrp1*, *Pmel*, and  
215 *Mlana* [40, 53, 56, 57]. Unlike *Sox10*, *Mitf* is not differentially expressed in any of the phenotypes  
216 we tested (Fig. 5C). This result suggests that melanocytes are present in the feathers of all  
217 phenotypes, even in severely depigmented feathers [9]. Two genes that activate *Mitf* expression  
218 (*Sox10* and *Mclr*, see below; Fig. 5C) are downregulated, which implies that *Mitf* would be  
219 downregulated as well. However, the persistence of high *Mitf* expression could be the result of  
220 activation by other pathways such as Wnt and c-Kit signaling [56]. Together, our gene expression  
221 results indicate that melanocytes are present in all feather buds of Almond pigeons (*Mitf* is  
222 expressed), but decreased *Sox10* expression in light and homozygous Almond feathers suggests  
223 multiple copies of the Almond CNV are associated with dysfunction early in melanogenesis in  
224 light and homozygous Almond feathers (*Sox10* expression is decreased).

225           We next assayed genes involved in pigment production, an indicator of melanocyte  
226 function. *Mclr*, which encodes a G-protein-coupled receptor necessary for eumelanin production  
227 [58], and *Tyrosinase*, which encodes a critical enzyme for both eumelanin and pheomelanin  
228 production, were downregulated only in homozygous Almond feather buds (Fig. 5C). Therefore,  
229 expression of two key determinants of pigment production is affected only in the most severe  
230 depigmentation phenotype. *Tyrp1*, which encodes another enzyme important for eumelanin but  
231 not pheomelanin production [59], was downregulated in all Almond feather buds, with the most  
232 severe effects in light and homozygous Almond feather buds (Fig. 5C). Thus, the eumelanin  
233 synthesis pathway is affected in all Almond feathers, but pigment generation and melanocyte  
234 function genes are more impacted in light Almond and homozygous Almond feather buds, with  
235 the most severe downregulation observed in homozygotes (Fig. 5C).

236           Finally, we measured expression of the melanosome structure gene *Pmel*. Melanosome  
237 structure is thought to be necessary for eumelanin but not pheomelanin production [60]. *Pmel* is  
238 an amyloid protein that forms part of the melanosome matrix, an important structural component  
239 of the mature melanosome [60–62]. Our candidate gene *Mlana* encodes a protein that interacts  
240 with *Pmel* and is also critical for melanosome matrix formation. We found that *Pmel* is  
241 downregulated in all Almond feather buds, and most severely in the two most depigmented types,  
242 light Almond and homozygous Almond (Fig. 5C). As described above, *Mlana* expression  
243 increased in dark Almond feathers but was similar to non-Almond in light Almond and  
244 homozygous Almond feather buds. These results are difficult to reconcile because these two genes  
245 are regulated by *Mitf*. Nevertheless, our results show that even the pigmented feathers in Almond  
246 birds show altered expression of pigmentation genes.

247 In summary, in homozygous Almond feather buds, the pigmentation production pathway  
248 is altered at an early stage of eumelanogenesis. In birds with one copy of the Almond allele ( $Z^{St}Z^+$   
249 and  $Z^{St}W$ ) light feathers show downregulation of more eumelanin production genes than do dark  
250 feathers. Thus, phenotypically different Almond feathers have distinct pigmentation gene  
251 expression profiles.

252

### 253 **Other alleles at the *St* locus are copy number variants**

254 Classical genetic studies point to multiple depigmentation alleles at the *St* locus [20, 29,  
255 63, 64]. To determine if the Almond CNV is associated with these other alleles as well, we  
256 genotyped pigeons with other *St*-linked phenotypes and found significant increases in copy number  
257 in Qualmond ( $St^Q$ ; N=10,  $p=8.3e-06$ ), Sandy ( $St^{Sa}$ ; N=3,  $p=3.2e-02$ ), Faded ( $St^{Fa}$ ; N=11,  $p=5.0e-$   
258 07), and Chalky ( $St^C$ ; N=6,  $p=2.7e-04$ ) pigeons compared to birds without *St*-linked phenotypes  
259 (Fig. 4, S4 Table). Another allele, Frosty ( $St^{fr}$ ), showed a trend of copy number increase that did  
260 not reach significance (N=6,  $p=1$ ). Together, these results demonstrate that copy number increase  
261 is associated with a variety of depigmentation alleles at the *St* locus.

262 We next asked whether different *St* alleles share the same CNV breakpoints. We amplified  
263 and sequenced across the Almond CNV breakpoints in Qualmond (N=4), Sandy (N=2), Faded  
264 (N=2), and Chalky (N=4) pigeons and found that the breakpoints are identical in all phenotypes  
265 tested. Therefore, a single initial mutational event was probably followed by different degrees of  
266 expansion in different *St* alleles. Notably, the breakpoints of the 77-kb segment (ScoHet5\_227:  
267 5,181,467 and 5,259,256) are enriched for CT repeats. These repeat sites could facilitate non-  
268 allelic homologous recombination, which could have generated the *St* allelic series [65].

269

270 **DISCUSSION**

271 ***Mlana* is a strong candidate gene for the Almond phenotype**

272 We identified a CNV associated with plumage pigmentation variation and an eye defect in  
273 domestic pigeons. Different numbers of copies of this structural variant are associated with a series  
274 of depigmentation alleles at the same locus. In the feathers of Almond birds, the CNV is associated  
275 with changes in the expression of genes within its bounds.

276 One of these genes, *Mlana*, is a strong candidate for Almond due to its role in melanosome  
277 maturation. *Mlana* and *Pmel* are co-regulated by *Mitf* and their protein products physically interact  
278 with each other during the process of matrix formation in the melanosome [41, 66]. Notably, *Pmel*  
279 mutations cause pigmentation phenotypes in cattle, chicken, and mouse [67–70]. *Pmel* mutations  
280 in horse, dog, and zebrafish result in both pigmentation phenotypes and eye defects, similar to  
281 Almond pigeons [37, 71–75]. For example, the merle coat pattern in dogs is associated with a  
282 transposon insertion in an intron of the *PMEL* gene, resulting in a non-functional PMEL protein  
283 and a phenotype that is remarkably similar to the Almond phenotype in pigeons [37, 72]. Dogs  
284 homozygous for the *PMEL* mutation, much like homozygous Almond pigeons, are severely  
285 hypopigmented. Additionally, homozygous *PMEL* mutant dogs have various eye defects, such as  
286 increased intraocular pressure, ametropia, microphthalmia, and coloboma [76]. The observation  
287 that *Pmel*, which interacts directly with *Mlana*, is repeatedly connected to both pigmentation and  
288 eye defects makes *Mlana* a strong candidate for similar correlated phenotypes in Almond pigeons.  
289 Likewise, in humans and mice, mutations in melanosome genes (e.g., *Oca2*, *Slc45a2*, *Slc24a5*)  
290 produce both epidermal depigmentation and eye defects, thereby further demonstrating a shared  
291 developmental link between these structures [77–79].

292           The other full-length gene within the CNV, *Slc16a7*, does not have a known role in  
293 pigmentation. However, this gene is a member of a class of monocarboxylate transporters that are  
294 necessary to efficiently remove lactate from photoreceptor cells to prevent intracellular acidosis,  
295 and to maintain a high glycolysis rate and proper cellular metabolism [44–46, 80, 81]. We  
296 speculate that irregular expression of this gene could lead to cell death or dysfunction by causing  
297 toxic lactic acid concentrations or by preventing lactic acid transport to nearby cells. In  
298 regenerating Almond feathers, *Slc16a7* expression increases substantially (40-fold) relative to  
299 non-Almond feathers, raising the possibility that this gene is somehow involved in pigmentation.  
300 In short, changes in *Slc16a7* expression could drive components of the Almond phenotype in  
301 feathers, eyes, or perhaps both. However, given the linked pigment and eye phenotypes observed  
302 in *Pmel* mutants in other species, *Mlana* alone could be sufficient to induce both pigmentation and  
303 eye defects in Almond pigeons. Future work will explore these various possibilities.

304

### 305 **Gene expression is altered in Almond birds**

306           In other organisms, copy number variation can result in gene expression changes in the same  
307 direction as the copy number change (i.e., the presence of more copies is correlated with higher  
308 expression) [82–84]. We observed a similar trend of higher expression of genes captured in the  
309 Almond-linked CNV (Fig. 5A). In contrast to this trend, however, *Mlana* showed an increase in  
310 expression in dark Almond feathers, but not in light Almond or homozygous Almond  
311 (unpigmented) feathers. *Mlana* is also the gene with the greatest copy number increase, with up to  
312 14 copies in hemizygous Almond genomes and 28 copies in the homozygous Almond genome.

313           With the above observations of gene expression in mind, why might homozygous Almond  
314 birds lack *Mlana* expression in feather buds when they have 28 copies of the gene? One possibility

315 is epigenetic silencing. High copy numbers in tandem arrays induce gene silencing in several  
316 organisms [85–89]. In fruit flies, for example, tandem arrays lead to variegated gene expression of  
317 the white eye gene [86]. This change in expression, in turn, leads to mosaic eye color, a scenario  
318 reminiscent of the color mosaicism in the feathers of Almond pigeons. In mouse, experimentally  
319 reducing the number of copies of *lacZ* in a tandem array causes an increase in gene expression,  
320 indicating that reducing copy number may relieve gene silencing [88]. Likewise, it is possible that  
321 somatic copy number decrease could relieve gene silencing and restore higher expression of *Mlana*  
322 in dark Almond feather buds.

323 Another potential explanation for the lack of *Mlana* expression in homozygous Almond  
324 feathers is cell death or immunity-mediated destruction of melanocytes. Overexpression of *Mlana*  
325 could have a toxic effect on cells, leading to cell death before melanocyte maturation. Similarly,  
326 in humans, overexpression of genes is often associated with disease [90–92], and in yeast,  
327 overexpression of genes can reduce growth rate [93]. Alternatively, Almond melanocytes might  
328 elicit an autoimmune response, similar to the destruction of melanocytes in human pigmentation  
329 disorders. MLANA is a dominant antigenic target for the T cell autoimmune response in human  
330 skin affected by vitiligo [94, 95], and perhaps the presentation of *Mlana* antigens in Almond  
331 pigeons elicits a response that depletes melanocytes in the developing feather buds. A potentially  
332 analogous autoimmune response depletes the melanocyte population and mimics vitiligo in Smyth  
333 line chickens [96].

334 If genes in the CNV are being randomly silenced in Almond pigeons, or cells with high  
335 expression are escaping cell death in a random manner, then we might expect to see high variance  
336 in gene expression among Almond feather samples. Consistent with this prediction, the variance  
337 in expression of *Mlana* in both dark and light Almond feather buds trends higher than in non-

338 Almond samples (Fig. 5A). This variance might also explain the random pattern of pigmentation  
339 and de-pigmentation observed in the feathers of these birds. If each cell population is affected  
340 differently due to stochastic events resulting in differential expression, then random pigmentation  
341 patterns could be the outcome.

342

### 343 **CNVs as mechanisms for the rapid generation of new phenotypes**

344 In addition to finding a CNV at the *St* locus in Almond birds, we found quantitative  
345 variation in copy number among other alleles at this locus. Variation at this CNV may have a  
346 quantitative effect on de-pigmentation, with the degree of copy number increase correlating with  
347 degree of depigmentation and eye defects. For example, pigeon breeders report that Sandy and  
348 Whiteout – two phenotypes with among the highest numbers of copies of the CNV (Fig. 4) – have  
349 associated eye defects similar to Almond (Tim Kvidera, personal communication) [29, 63].  
350 Although we currently have a small sample size of other *St*-linked phenotypes, we see a trend that  
351 other alleles produce milder pigment phenotypes and have less CNV expansion than the Almond  
352 allele. Similar quantitative effects of CNVs occur in other organisms as well, including a  
353 correlation between comb size and copy number of *Sox5* intron 1 in chickens [97].

354 Pigeon breeders have reported that parents with one *St*-linked phenotype can produce  
355 offspring of another phenotype in the *St* series [29, 98]. Specifically, Faded, Qualmond, and  
356 Hickory pigeons have produced Almond offspring. These classical breeding studies suggest that  
357 allelic conversion can occur rapidly and, based on our finding of copy number variation among *St*  
358 alleles, may result from simple expansion or contraction of a CNV. In another striking similarity  
359 between Merle dogs and Almond pigeons, germline expansions or contractions of the *Merle* allele  
360 of *PMEL* result in a spectrum of coat pattern phenotypes that can differ between parents and



361 offspring [72, 99]. Thus, unstable CNVs like the one we found at the *St* locus may provide a  
362 mechanism for extraordinarily rapid phenotypic diversification in pigeons and other organisms  
363 [100–103].

364

## 365 **MATERIALS & METHODS**

### 366 **Animal husbandry**

367 Animal husbandry and experimental procedures were performed in accordance with  
368 protocols approved by the University of Utah Institutional Animal Care and Use Committee  
369 (protocols 10-05007, 13-04012, and 16-03010).

370

### 371 **DNA sample collection and extraction**

372 Blood samples were collected in Utah at local pigeon shows, at the homes of local pigeon  
373 breeders, and from pigeons in the Shapiro lab. Photos of each bird were taken upon sample  
374 collection for our records and for phenotype verification. Breeders outside of Utah were contacted  
375 by email to obtain feather samples. Breeders were sent feather collection packets and instructions,  
376 and feather samples were sent back to the University of Utah along with detailed phenotypic  
377 information and genetic relatedness. DNA was then extracted from blood, as previously described  
378 [4]. DNA from feathers was extracted using the user developed protocol for Purification of total  
379 DNA from nails, hair, or feathers using the DNeasy Blood & Tissue Kit (Qiagen Sciences,  
380 Germantown, MD).

381

### 382 **Genomic analyses**

383 BAM files from a panel of previously resequenced birds were combined with BAM files  
384 derived from new sequences from 11 Almond females and 16 non-Almond birds aligned to the  
385 Cliv\_2.1 genome assembly [104] (new sequence accessions: SRA SRP176668, accessions  
386 SRR8420387-SRR8420407 and SRR9003406-SRR9003411; BAM files created as described  
387 previously [6]). SNVs and small indels were called using the Genome Analysis Toolkit (Unified  
388 Genotyper and LeftAlign and TrimVariants functions, default settings [105]). Variants were  
389 filtered as described previously [38] and the subsequent variant call format (VCF) file was used  
390 for downstream analyses.

391 Whole genomes of 12 Almond and 96 non-Almond birds were tested for allele frequency  
392 differentiation using pFst (VCFLIB software library, <https://github.com/vcflib>; see S1 Table for  
393 sample information) [38]. For analysis of fixed coding changes, VAAST 2.0 [39] was used to  
394 conduct an association test and to search for putative disease-causing genetic variants common to  
395 all Almond individuals but absent from non-Almonds. Annotated variants from affected  
396 individuals were merged by simple union into a target file. The background file included variants  
397 from 66 non-Almond birds, while the target file contained variants from the 12 Almond birds. This  
398 VAAST analysis revealed that there were no fixed genetic variants among the Almond individuals  
399 that were absent in the background dataset.

400

#### 401 **CNV breakpoint identification and read-depth analysis**

402 Read depth in the CNV-containing region was analyzed in 12 Almond and 118 non-  
403 Almond resequenced whole genomes. Scaffold ScoHet5\_227 gdepth files were generated using  
404 VCFtools [108]. Read depth was normalized using a region (scaffold ScoHet5\_227: 1-5,000,000)  
405 that did not show an increase in sequencing coverage in Almond genomes.

406 To determine the CNV breakpoints, we first identified the region of increased sequencing  
407 coverage in Almond genomes using the depth function in VCFtools [108]. Next, we examined  
408 BAM files of Almond genomes in IGV [110] in the region of coverage increase, and identified  
409 locations at which reads were consistently split (did not map contiguously). These locations were  
410 the putative breakpoints. We then designed PCR primers that amplify 1-kb products spanning the  
411 putative breakpoints (see S5 Table for primer sequences). Finally, we used PCR to amplify across  
412 the putative breakpoints. PCR products were purified and sequenced, and aligned to the pigeon  
413 genome assembly using Blast+ version 2.7.1 [109]. The CNV breakpoint primers (see Fig. 3B)  
414 successfully amplified products in 40 of 43 Almond pigeons tested.

415

#### 416 **Fusion gene analysis**

417 The putative mRNA sequence of the *Ermp1/Kiaa2026* fusion gene was determined by  
418 concatenating the mRNA sequence of the exons on one side of the outer breakpoint with the exons  
419 that map to the outer breakpoint. The fusion of these exons was confirmed using exon spanning  
420 primers and qPCR (See S5 Table for primer sequences). The putative mRNA sequence was  
421 translated, and then analyzed for domains using HMMER searches in SMART (Simple Modular  
422 Architecture Research Tool) [48]. We searched for domains in the SMART database, and also  
423 searched for outlier homologs, PFAM domains, signal peptides, and internal repeats.

424

#### 425 **Taqman assay for copy number estimates**

426 Copy number variation was estimated using a custom Taqman Copy Number Assay  
427 targeted to the *Mlana* region (MLANA\_CCWR201) for 150 Almond, 9 Qualmond, 3 Sandy, 14  
428 Faded, and 6 Chalky, 5 Frosty, and 56 individuals without *St*-linked phenotypes. Following DNA

429 extraction, samples were diluted to 5 ng/uL and run in quadruplicate according to manufacturer's  
430 protocol. Copy number was determined using CopyCaller Software v2.1 (ThermoFisher Scientific,  
431 Waltham, MA). An intron in *RNaseP* was used for normalization of copy number.

432

### 433 **RNA isolation and cDNA synthesis**

434 To assay gene expression, secondary covert wing feathers were plucked to stimulate  
435 regeneration and allowed to regenerate for 9 days (see S2 Table for sample details). Nine-day  
436 regenerating feather buds were plucked, then the proximal 5 mm was cut and stored in RNA later  
437 at 4°C overnight. Feather buds were then dissected and collar cells removed, and stored at -80°C  
438 until RNA isolation. RNA was then isolated and reverse transcribed to cDNA as described  
439 previously [4].

440

### 441 **qRT-PCR analysis**

442 cDNA was amplified using intron-spanning primers for the appropriate targets using a  
443 CFX96 qPCR instrument and iTaq Universal Sybr Green Supermix (Bio-Rad, Hercules, CA) (S5  
444 Table). Samples were run in duplicate and normalized to  $\beta$ -actin (see S3 Table for raw results).  
445 Results were compared in R [111] using ANOVA, followed by a Tukey post hoc test to determine  
446 differences between phenotypic groups. Differences were considered statistically significant if  $p$   
447  $< 0.05$ . Primers used for each gene are included in S5 Table.

448

### 449 **ACKNOWLEDGEMENTS**

450 We thank past and present members of the Shapiro lab for assistance with sample collection and  
451 processing; members of the Utah Pigeon Club and National Pigeon Association for sample

452 contributions; and Ken Davis and Tim Kvidera for critical discussions and advice. We thank Tim  
453 Kvidera for photographs of Whiteout, Sandy, Frosty, Faded, and Chalky pigeons in Figure 4. We  
454 thank Anna Vickrey, Max Sidesinger, Elena Boer, Emily Maclary, Sara Young, and Robert  
455 Greenhalgh, for technical assistance and advice. This work was supported by the National Science  
456 Foundation (CAREER DEB-1149160 to M.D.S.; GRF 1256065 to R.B.) and the National  
457 Institutes of Health (R01GM115996 and R35GM131787 to M.D.S., R01GM104390 to M.Y.,  
458 fellowship T32GM007464 to Z.K.). The funders had no role in study design, data collection and  
459 analysis, decision to publish, or preparation of the manuscript. We acknowledge a computer time  
460 allocation from the Center for High Performance Computing at the University of Utah.

461

## 462 REFERENCES

- 463 1. Protas ME, Patel NH. (2008) Evolution of Coloration Patterns. *Annual Review of Cell and*  
464 *Developmental Biology* 24:425–471. doi:10.1146/annurev.cellbio.24.110707.175302.
- 465 2. Roberts NW, Mappes J, Arbuckle K, et al. (2017) The biology of color. *Science*  
466 357:eaan0221. doi:10.1126/science.aan0221.
- 467 3. Domyan ET, Shapiro MD. (2017) Pigeonetics takes flight: Evolution, development, and  
468 genetics of intraspecific variation. *Developmental Biology* 427:241–250.  
469 doi:10.1016/J.YDBIO.2016.11.008.
- 470 4. Domyan ET, Guernsey MW, Kronenberg Z, et al. (2014) Epistatic and combinatorial  
471 effects of pigmentary gene mutations in the domestic pigeon. *Current Biology* 24:459–  
472 464. doi:10.1016/j.cub.2014.01.020.
- 473 5. Guernsey MW, Ritscher L, Miller MA, Smith DA, Schöneberg T, Shapiro MD. (2013) A  
474 Val85Met Mutation in Melanocortin-1 Receptor Is Associated with Reductions in

- 475 Eumelanic Pigmentation and Cell Surface Expression in Domestic Rock Pigeons  
476 (*Columba livia*). PLoS ONE 8:1–9. doi:10.1371/journal.pone.0074475.
- 477 6. Vickrey AI, Bruders R, Kronenberg Z, et al. (2018) Introgression of regulatory alleles and  
478 a missense coding mutation drive plumage pattern diversity in the rock pigeon. eLife  
479 7:e34803. doi:10.7554/eLife.34803.
- 480 7. Manceau M, Domingues VS, Linnen CR, Rosenblum EB, Hoekstra HE. (2010)  
481 Convergence in pigmentation at multiple levels: mutations, genes and function.  
482 Philosophical Transactions of the Royal Society B 365:2439–2450.  
483 doi:10.1098/rstb.2010.0104.
- 484 8. Rosenblum EB, Parent CE, Brandt EE. (2014) The Molecular Basis of Phenotypic  
485 Convergence. Annual Review of Ecology, Evolution, and Systematics 45:203–226.  
486 doi:10.1146/annurev-ecolsys-120213-091851.
- 487 9. Cieslak M, Reissmann M, Hofreiter M, Ludwig A. (2011) Colours of domestication.  
488 Biological Reviews 86:885–899. doi:10.1111/j.1469-185X.2011.00177.x.
- 489 10. Hoekstra HE. (2006) Genetics, development and evolution of adaptive pigmentation in  
490 vertebrates. Heredity 97:222–234. doi:10.1038/sj.hdy.6800861.
- 491 11. Mallarino R, Henegar C, Mirasierra M, Manceau M, Schradin C, Vallejo M, Beronja S,  
492 Barsh GS, Hoekstra HE. (2016) Developmental mechanisms of stripe patterns in rodents.  
493 Nature 539:518–523. doi:10.1038/nature20109.
- 494 12. Parichy DM. (2003) Pigment patterns: fish in stripes and spots. Current Biology 13:R947-  
495 50. doi:10.1016/J.CUB.2003.11.038.
- 496 13. Salmon Hillbertz NHC, Isaksson M, Karlsson EK, et al. (2007) Duplication of FGF3,  
497 FGF4, FGF19 and ORAOV1 causes hair ridge and predisposition to dermoid sinus in

- 498 Ridgeback dogs. *Nature Genetics* 39:1318–1320. doi:10.1038/ng.2007.4.
- 499 14. Brunberg E, Andersson L, Cothran G, Sandberg K, Mikko S, Lindgren G. (2006) A  
500 missense mutation in PMEL17 is associated with the Silver coat color in the horse. *BMC*  
501 *Genetics* 7:46. doi:10.1186/1471-2156-7-46.
- 502 15. Roberts RB, Moore EC, Kocher TD. (2017) An allelic series at pax7a is associated with  
503 colour polymorphism diversity in Lake Malawi cichlid fish. *Molecular Ecology* 26:2625–  
504 2639. doi:10.1111/mec.13975.
- 505 16. Parichy DM, Spiewak JE. (2015) Origins of adult pigmentation: diversity in pigment stem  
506 cell lineages and implications for pattern evolution. *Pigment Cell and Melanoma Research*  
507 *Melanoma Research* 28:31–50. doi:10.1111/pcmr.12332.
- 508 17. Wriedt C, Christie W. (1925) Zur Genetik der gesprenkelten Haustaube. *Induktive*  
509 *Abstammungs- und Vererbungslehre* 38:271–306. doi:10.1007/BF02118234.
- 510 18. Sell A. (2012) Pigeon genetics: applied genetics in the domestic pigeon. Sell Publishing,  
511 Achim, Germany
- 512 19. Hollander WF, Cole LJ. (1940) Somatic Mosaics in the Domestic Pigeon. *Genetics* 25:16–  
513 40.
- 514 20. Hollander WF. (1942) Auto-sexing in the domestic pigeon. *Journal of Heredity* 33:135–  
515 140. doi:10.1093/oxfordjournals.jhered.a105150.
- 516 21. Quinn JW. (1971) *The Pigeon Breeders Notebook An Introduction to Pigeon Science*.  
517 Published by Author, Atwater, Ohio
- 518 22. Ghigi A. (1908) Sviluppo e comparsa di caratteri sessuali secondari in alcuni ucelli. *Reale*  
519 *Accademia delle Scienze dell’Istituto di Bologna* 15 Mar:3–23.
- 520 23. Moore J. (1735) *Columbarium: or, the pigeon-house; being an introduction to a natural*

- 521 history of tame pigeons. London
- 522 24. Ezzedine K, Eleftheriadou V, Whitton M, Van Geel N. (2015) Vitiligo. *The Lancet*
- 523 386:74–84. doi:10.1016/S0140-6736(14)60763-7.
- 524 25. Yaghoobi R, Omidian M, Bagherani N. (2011) Vitiligo: A review of the published work.
- 525 *Journal of Dermatology* 38:419–431. doi:10.1111/j.1346-8138.2010.01139.x.
- 526 26. Njoo MD, Westerhof W. (2001) Vitiligo Pathogenesis and treatment. *American Journal of*
- 527 *Clinical Dermatology* 2:167–81. doi:10.2165/00128071-200102030-00006.
- 528 27. Tobin DJ, Paus R. (2001) Graying: Gerontobiology of the hair follicle pigmentary unit.
- 529 *Experimental Gerontology* 36:29–54. doi:10.1016/S0531-5565(00)00210-2.
- 530 28. Endou M, Aoki H, Kobayashi T, Kunisada T. (2014) Prevention of hair graying by factors
- 531 that promote the growth and differentiation of melanocytes. *The Journal of Dermatology*
- 532 41:716–723. doi:10.1111/1346-8138.12570.
- 533 29. Peter J, Rodgers R. (2015) The Pigeon Genetics Newsletter. *The Pigeon Genetics*
- 534 *Newsletter* 10:1–25.
- 535 30. Hollander WF. (1944) Mosaic Effects in Domestic Birds. *The Quarterly Review of*
- 536 *Biology* 19:285–307.
- 537 31. Wright L, Lumley RW, Ludlow JW, Lydon AF. (1895) *Fulton’s Book of Pigeons*.
- 538 32. Bellone RR. (2010) Pleiotropic effects of pigmentation genes in horses. *Animal Genetics*
- 539 41:100–110. doi:10.1111/j.1365-2052.2010.02116.x.
- 540 33. Andersson LS, Wilbe M, Viluma A, Cothran G, Ekesten B, Ewart S, Lindgren G. (2013)
- 541 *Equine Multiple Congenital Ocular Anomalies and Silver Coat Colour Result from the*
- 542 *Pleiotropic Effects of Mutant PMEL*. *PLoS ONE* 8:e75639.
- 543 doi:10.1371/journal.pone.0075639.



- 544 34. Osinchuk S, Grahn B. (2018) Diagnostic ophthalmology. *Canadian Veterinary Journal*  
545 59:315–316.
- 546 35. Ségard EM, Depecker MC, Lang J, Gemperli A, Cadoré J-L. (2013) Ultrasonographic  
547 features of PMEL17 (Silver) mutant gene-associated multiple congenital ocular anomalies  
548 (MCOA) in Comtois and Rocky Mountain horses. *Veterinary Ophthalmology* 16:429–  
549 435. doi:10.1111/vop.12021.
- 550 36. Ramsey DT, Ewart SL, Render JA, Cook CS, Latimer CA. (1999) Congenital ocular  
551 abnormalities of Rocky Mountain Horses. *Veterinary Ophthalmology* 2:47–59.  
552 doi:10.1046/j.1463-5224.1999.00050.x.
- 553 37. Clark LA, Wahl JM, Rees CA, Murphy KE. (2006) Retrotransposon insertion in SILV is  
554 responsible for merle patterning of the domestic dog. *PNAS* 103:1376–81.  
555 doi:10.1073/pnas.0506940103.
- 556 38. Domyan ET, Kronenberg Z, Infante CR, et al. (2016) Molecular shifts in limb identity  
557 underlie development of feathered feet in two domestic avian species. *eLife* 5:e12115.  
558 doi:10.7554/eLife.12115.
- 559 39. Hu H, Huff CD, Moore B, Flygare S, Reese MG, Yandell M. (2013) VAAST 2.0:  
560 Improved Variant Classification and Disease-Gene Identification Using a Conservation-  
561 Controlled Amino Acid Substitution Matrix. *Genetic Epidemiology* 37:622–634.  
562 doi:10.1002/gepi.21743.
- 563 40. Widlund HR, Fisher DE, Ramaswamy S, Miller AJ, Du J, Horstmann MA. (2011)  
564 MLANA/MART1 and SILV/PMEL17/GP100 Are Transcriptionally Regulated by MITF  
565 in Melanocytes and Melanoma. *The American Journal of Pathology* 163:333–343.  
566 doi:10.1016/s0002-9440(10)63657-7.

- 567 41. Hoashi T, Watabe H, Muller J, Yamaguchi Y, Vieira WD, Hearing VJ. (2005) MART-1 is  
568 required for the function of the melanosomal matrix protein PMEL17/GP100 and the  
569 maturation of melanosomes. *Journal of Biological Chemistry* 280:14006–14016.  
570 doi:10.1074/jbc.M413692200.
- 571 42. Mazie AM De, Donselaar E Van, Salvi S, Davoust J, Cerottini J, Slot JW. (2002) The  
572 Melanocytic Protein Melan-A / MART-1 Has a Subcellular Localization Distinct from  
573 Typical Melanosomal Proteins. *Traffic* 3:678–693.
- 574 43. Zeuthen T, Hamann S, La Cour M. (1996) Cotransport of H<sup>+</sup>, lactate and H<sub>2</sub>O by  
575 membrane proteins in retinal pigment epithelium of bullfrog. *Journal of Physiology*  
576 497:3–17. doi:10.1113/jphysiol.1996.sp021745.
- 577 44. Halestrap AP, Meredith D. (2004) The SLC16 gene family - From monocarboxylate  
578 transporters (MCTs) to aromatic amino acid transporters and beyond. *Pflugers Archiv*  
579 *European Journal of Physiology* 447:619–628. doi:10.1007/s00424-003-1067-2.
- 580 45. Meredith D, Christian HC. (2008) The SLC16 monocarboxylate transporter family.  
581 *Xenobiotica* 38(7-8):1072–1106. doi:10.1080/00498250802010868.
- 582 46. Chidlow G, Wood JPM, Graham M, Osborne NN. (2004) Expression of monocarboxylate  
583 transporters in rat ocular tissues. *American Journal of Physiology-Cell Physiology*  
584 288:C416–C428. doi:10.1152/ajpcell.00037.2004.
- 585 47. Jackson VN, Price NT, Carpenter L, Halestrap AP. (1997) Cloning of the  
586 monocarboxylate transporter isoform MCT2 from rat testis provides evidence that  
587 expression in tissues is species-specific and may involve post-transcriptional regulation.  
588 *The Biochemical Journal* 324:447–453. doi:10.1042/bj3240447.
- 589 48. Letunic I, Bork P. (2017) 20 years of the SMART protein domain annotation resource.

- 590 Nucleic Acids Research 46:D493–D496. doi:10.1093/nar/gkx922.
- 591 49. Price ER, Horstmann MA, Wells AG, Weilbaecher KN, Takemoto CM, Landis MW,  
592 Fisher DE. (1998)  $\alpha$ -melanocyte-stimulating hormone signaling regulates expression of  
593 Microphthalmia, a gene deficient in Waardenburg syndrome. Journal of Biological  
594 Chemistry 273:33042–33047. doi:10.1074/jbc.273.49.33042.
- 595 50. Aberdam E, Bertolotto C, Sviderskaya E V, de Thillot V, Hemesath TJ, Fisher DE,  
596 Bennett DC, Ortonne JP, Ballotti R. (1998) Involvement of microphthalmia in the  
597 inhibition of melanocyte lineage differentiation and of melanogenesis by agouti signal  
598 protein. Journal of Biological Chemistry 273:19560–19565.  
599 doi:10.1074/JBC.273.31.19560.
- 600 51. Dunn KJ, Brady M, Ochsenbauer-Jambor C, Snyder S, Incao A, Pavan WJ. (2005) WNT1  
601 and WNT3a promote expansion of melanocytes through distinct modes of action. Pigment  
602 Cell Research 18:167–180. doi:10.1111/j.1600-0749.2005.00226.x.
- 603 52. Takeda K, Yasumoto K, Takada R, Takada S, Watanabe K, Udono T, Saito H, Takahashi  
604 K, Shibahara S. (2000) Induction of melanocyte-specific microphthalmia-associated  
605 transcription factor by Wnt-3a. Journal of Biological Chemistry 275:14013–14016.  
606 doi:10.1074/jbc.C000113200.
- 607 53. Levy C, Khaled M, Fisher DE. (2006) MITF: master regulator of melanocyte development  
608 and melanoma oncogene. Trends in Molecular Medicine 12:406–414.  
609 doi:10.1016/j.molmed.2006.07.008.
- 610 54. Haase E, Ito S, Sell A, Wakamatsu K. (1992) Feathers from Wild and Domestic Pigeons.  
611 The Journal of Heredity 83:4–7. doi:10.1093/oxfordjournals.jhered.a111160.
- 612 55. Harris ML, Baxter LL, Loftus SK, Pavan WJ. (2010) Sox proteins in melanocyte

- 613 development and melanoma. *Pigment Cell and Melanoma Research* 23:496–513.
- 614 doi:10.1111/j.1755-148X.2010.00711.x.
- 615 56. Steingrímsson E, Copeland NG, Jenkins NA. (2004) Melanocytes and the Microphthalmia  
616 Transcription Factor Network. *Annual Review of Genetics* 38:365–411.  
617 doi:10.1146/annurev.genet.38.072902.092717.
- 618 57. Yasumoto K, Yokoyama K, Takahashi K, Tomita Y, Shibahara S. (1997) Functional  
619 analysis of microphthalmia-associated transcription factor in pigment cell-specific  
620 transcription of the human tyrosinase family genes. *Journal of Biological Chemistry*  
621 272:503–9. doi:10.1074/jbc.272.1.503.
- 622 58. Mountjoy KG, Robbins LS, Mortrud MT, Cone RD. (1992) The cloning of a family of  
623 genes that encode the melanocortin receptors. *Science* 257:1248–1251.  
624 doi:10.1126/science.1325670.
- 625 59. Zdarsky E, Favor J, Jackson IJ. (1990) The molecular basis of brown, an old mouse  
626 mutation, and of an induced revertant to wild type. *Genetics* 126:443–449.
- 627 60. Watt B, Van Niel G, Raposo G, Marks MS. (2013) PMEL: A pigment cell-specific model  
628 for functional amyloid formation. *Pigment Cell and Melanoma Research* 26:300–315.  
629 doi:10.1111/pcmr.12067.
- 630 61. Hellström AR, Watt B, Fard SS, et al. (2011) Inactivation of PMEL alters melanosome  
631 shape but has only a subtle effect on visible pigmentation. *PLoS Genetics*. doi:  
632 10.1371/journal.pgen.1002285
- 633 62. Kobayashi T, Urabe K, Orlow SJ, Higashi K, Imokawa G, Kwon BS, Potterf B, Hearing  
634 VJ. (1994) The Pmel 17/silver locus protein. Characterization and investigation of its  
635 melanogenic function. *Journal of Biological Chemistry* 269:29198–29205.

- 636 63. Huntley R. (1999) The Almond Family.  
637 <http://www.angelfire.com/ga/huntleyloft/qualmond.html>. Accessed 1 Jan 2017
- 638 64. Hollander WF. (1975) Sectorial Mosaics in the Domestic Pigeon : 25 More Years. Journal  
639 of Heredity 66:177–202.
- 640 65. Colnaghi R, Carpenter G, Volker M, O’Driscoll M. (2011) The consequences of structural  
641 genomic alterations in humans: Genomic Disorders, genomic instability and cancer.  
642 Seminars in Cell and Developmental Biology 22:875–885.  
643 doi:10.1016/j.semcd.2011.07.010.
- 644 66. Du J, Miller AJ, Widlund HR, Horstmann MA, Ramaswamy S, Fisher DE. (2003)  
645 MLANA/MART1 and SILV/PMEL17/GP100 Are Transcriptionally Regulated by MITF  
646 in Melanocytes and Melanoma. American Journal of Pathology 163:333–343.  
647 doi:10.1016/S0002-9440(10)63657-7.
- 648 67. Kerje S, Sharma P, Gunnarsson U, et al. (2004) The Dominant white, Dun and Smoky  
649 color variants in chicken are associated with insertion/deletion polymorphisms in the  
650 PMEL17 gene. Genetics 168:1507–18. doi:10.1534/genetics.104.027995.
- 651 68. Kuehn C, Weikard R. (2007) Multiple splice variants within the bovine silver homologue  
652 (SILV) gene affecting coat color in cattle indicate a function additional to fibril formation  
653 in melanophores. BMC Genomics 8:335. doi:10.1186/1471-2164-8-335.
- 654 69. Schmutz SM, Dreger DL. (2013) Interaction of *MC1R* and *PMEL* alleles on solid coat  
655 colors in Highland cattle. Animal Genetics 44:9–13. doi:10.1111/j.1365-  
656 2052.2012.02361.x.
- 657 70. Kwon BS, Halaban R, Ponnazhagan S, Kim K, Chintamaneni C, Bennett D, Pickard RT.  
658 (1995) Mouse silver mutation is caused by a single base insertion in the putative

- 659 cytoplasmic domain of Pmel 17. *Nucleic Acids Research* 23:154–8.
- 660 71. Schonthaler HB, Lampert JM, Von Lintig J, Schwarz H, Geisler R, Neuhauss SCF. (2005)
- 661 A mutation in the silver gene leads to defects in melanosome biogenesis and alterations in
- 662 the visual system in the zebrafish mutant fading vision. *Developmental Biology* 284:421–
- 663 436. doi:10.1016/j.ydbio.2005.06.001.
- 664 72. Murphy SC, Evans JM, Tsai KL, Clark LA. (2018) Length variations within the Merle
- 665 retrotransposon of canine PMEL: correlating genotype with phenotype. *Mobile DNA*
- 666 9:26. doi:10.1186/s13100-018-0131-6.
- 667 73. Brunberg E, Andersson L, Cothran G, Sandberg K, Mikko S, Lindgren G. (2006) A
- 668 missense mutation in PMEL17 is associated with the Silver coat color in the horse. *BMC*
- 669 *Genetics*. doi: 10.1186/1471-2156-7-46
- 670 74. Komáromy AM, Rowlan JS, La Croix NC, Mangan BG. (2011) Equine Multiple
- 671 Congenital Ocular Anomalies (MCOA) syndrome in PMEL17 (Silver) mutant ponies:
- 672 Five cases. *Veterinary Ophthalmology* 14:313–320. doi:10.1111/j.1463-
- 673 5224.2011.00878.x.
- 674 75. Hellström AR, Watt B, Fard SS, et al. (2011) Inactivation of Pmel Alters Melanosome
- 675 Shape But Has Only a Subtle Effect on Visible Pigmentation. *PLoS Genetics* 7:e1002285.
- 676 doi:10.1371/journal.pgen.1002285.
- 677 76. Gelatt KN, Powell NG, Huston K. (1981) Inheritance of microphthalmia with coloboma in
- 678 the Australian shepherd dog. *American Journal of Veterinary Research* 42:1686–1690.
- 679 77. Vogel P, Read RW, Vance RB, Platt KA, Troughton K, Rice DS. (2008) Ocular albinism
- 680 and hypopigmentation defects in *Slc24a5*<sup>-/-</sup> mice. *Veterinary Pathology* 45:264–279.
- 681 doi:10.1354/vp.45-2-264.

- 682 78. Brooks BP, Larson DM, Chan C-C, et al. (2007) Analysis of Ocular Hypopigmentation in  
683 Rab38 cht/cht Mice. *Investigative Ophthalmology & Visual Science* 48:3905.  
684 doi:10.1167/iovs.06-1464.
- 685 79. Gronskov K, Ek J, Brondum-Nielsen K. (2007) Oculocutaneous albinism. *Orphanet*  
686 *Journal of Rare Diseases* 2, 43. doi:10.1186/1750-1172-2-43.
- 687 80. Mannermaa E, Vellonen KS, Urtti A. (2006) Drug transport in corneal epithelium and  
688 blood-retina barrier: Emerging role of transporters in ocular pharmacokinetics. *Advanced*  
689 *Drug Delivery Reviews* 58:1136–1163. doi:10.1016/j.addr.2006.07.024.
- 690 81. Nguyen TT, Bonanno JA. (2012) Lactate-H<sup>+</sup> transport is a significant component of the  
691 in vivo corneal endothelial pump. *Investigative Ophthalmology & Visual Science*  
692 53:2020–2029. doi:10.1167/iovs.12-9475.
- 693 82. Stranger BE, Forrest MS, Dunning M, et al. (2007) Relative Impact of Nucleotide and  
694 Copy Number Variation on Gene Expression Phenotypes. *Science* 315:848–853.  
695 doi:10.1126/science.1137223.
- 696 83. Zhou J, Lemos B, Dopman EB, Hartl DL. (2011) Copy-number variation: The balance  
697 between gene dosage and expression in *Drosophila melanogaster*. *Genome Biology and*  
698 *Evolution* 3:1014–1024. doi:10.1093/gbe/evr023.
- 699 84. Freeman JL, Perry GH, Feuk L, et al. (2006) Copy number variation: New insights in  
700 genome diversity. *Genome Research* 949–961. doi:10.1101/gr.3677206.16.
- 701 85. Cruz C, Houseley J. (2014) Endogenous RNA interference is driven by copy number.  
702 *eLife* 3:e01581. doi:10.7554/eLife.01581.
- 703 86. Dorer DR, Henikoff S. (1994) Expansions of transgene repeats cause heterochromatin  
704 formation and gene silencing in *Drosophila*. *Cell* 77:993–1002. doi:10.1016/0092-

- 705 8674(94)90439-1.
- 706 87. Assaad FF, Tucker KL, Signer ER. (1993) Epigenetic repeat-induced gene silencing  
707 (RIGS) in Arabidopsis. *Plant Molecular Biology* 22:1067–1085.  
708 doi:10.1007/BF00028978.
- 709 88. Garrick D, Fiering S, Martin DIK, Whitelaw E. (1998) Repeat-induced gene silencing in  
710 mammals. *Nature Genetics* 18:56–59. doi:10.1038/ng0198-56.
- 711 89. Henikoff S. (1998) Conspiracy of silence among repeated transgenes. *BioEssays* 20:532–  
712 535. doi:10.1002/(SICI)1521-1878(199807)20:7<532::AID-BIES3>3.0.CO;2-M.
- 713 90. Girirajan S, Campbell CD, Eichler EE. (2011) Human Copy Number Variation and  
714 Complex Genetic Disease. *Annual Review of Genetics* 45:203–226. doi:10.1146/annurev-  
715 genet-102209-163544.
- 716 91. Wain L V., Armour J AL, Tobin MD. (2009) Genomic copy number variation, human  
717 health, and disease. *The Lancet* 374:340–350. doi:10.1016/S0140-6736(09)60249-X.
- 718 92. Zhang F, Gu W, Hurler ME, Lupski JR. (2009) Copy Number Variation in Human Health,  
719 Disease, and Evolution. *Annual Review of Genomics and Human Genetics* 10:451–81.  
720 doi:10.1146/annurev.genom.9.081307.164217.
- 721 93. Sopko R, Huang D, Preston N, et al. (2006) Mapping Pathways and Phenotypes by  
722 Systematic Gene Overexpression. *Molecular Cell* 21:319–330.  
723 doi:10.1016/j.molcel.2005.12.011.
- 724 94. Lang KS, Muhm A, Moris A, Stevanovic S, Rammensee H-G, Caroli CC, Wernet D,  
725 Schitteck B, Knauss-Scherwitz E, Garbe C. (2001) HLA-A2 Restricted, Melanocyte-  
726 Specific CD8+ T Lymphocytes Detected in Vitiligo Patients are Related to Disease  
727 Activity and are Predominantly Directed Against MelanA/MART1. *Journal of*



- 728 Investigative Dermatology 116:891–897. doi:10.1046/j.1523-1747.2001.01363.x.
- 729 95. Byrne KT, Turk MJ. (2011) New perspectives on the role of vitiligo in immune responses  
730 to melanoma. *Oncotarget* 2:684–94. doi:10.18632/oncotarget.323.
- 731 96. Shi F, Kong B-W, Song J, Lee J, Dienglewicz RL, Erf GF. (2012) Understanding  
732 mechanisms of vitiligo development in Smyth line of chickens by transcriptomic  
733 microarray analysis of evolving autoimmune lesions. *BMC Immunology* 13:18.  
734 doi:10.1186/1471-2172-13-18.
- 735 97. Wright D, Boije H, Meadows JRS, et al. (2009) Copy Number Variation in Intron 1 of  
736 SOX5 Causes the Pea-comb Phenotype in Chickens. *PLoS Genetics* 5:e1000512.  
737 doi:10.1371/journal.pgen.1000512.
- 738 98. Hollander WF. (1982) Origins and excursions in pigeon genetics- flecks and sex. The Ink  
739 Spot INC, Burton, Kansas
- 740 99. Sponenberg DP. (1984) Germinal reversion of the merle allele In Australian shepherd  
741 dogs. *Journal of Heredity* 75:78–78. doi:10.1093/oxfordjournals.jhered.a109874.
- 742 100. Farslow JC, Lipinski KJ, Packard LB, Edgley ML, Taylor J, Flibotte S, Moerman DG,  
743 Katju V, Bergthorsson U. (2015) Rapid Increase in frequency of gene copy-number  
744 variants during experimental evolution in *Caenorhabditis elegans*. *BMC Genomics*  
745 16:1044. doi:10.1186/s12864-015-2253-2.
- 746 101. Bryk J, Tautz D. (2014) Copy number variants and selective sweeps in natural populations  
747 of the house mouse (*Mus musculus domesticus*). *Frontiers in Genetics* 5:153.  
748 doi:10.3389/fgene.2014.00153.
- 749 102. Axelsson E, Ratnakumar A, Arendt ML, Maqbool K, Webster MT, Perloski M, Liberg O,  
750 Arnemo JM, Hedhammar Å, Lindblad-Toh K. (2013) The genomic signature of dog

- 751 domestication reveals adaptation to a starch-rich diet. *Nature* 495:360–364.  
752 doi:10.1038/nature11837.
- 753 103. Cone KR, Kronenberg ZN, Yandell M, Elde NC. (2017) Emergence of a Viral RNA  
754 Polymerase Variant during Gene Copy Number Amplification Promotes Rapid Evolution  
755 of Vaccinia Virus. *Journal of Virology* 91:e01428-16. doi:10.1128/jvi.01428-16.
- 756 104. Holt C, Campbell M, Keays DA, et al. (2018) Improved Genome Assembly and  
757 Annotation for the Rock Pigeon (*Columba livia*). *G3* 8:1391–1398.  
758 doi:10.1534/g3.117.300443.
- 759 105. McKenna A, Hanna M, Banks E, et al. (2010) The Genome Analysis Toolkit: A  
760 MapReduce framework for analyzing next-generation DNA sequencing data. *Genome*  
761 *Research* 20:1297–1303. doi:10.1101/gr.107524.110.
- 762 106. Yandell M, Huff C, Hu H, Singleton M, Moore B, Xing J, Jorde LB, Reese MG. (2011) A  
763 probabilistic disease-gene finder for personal genomes. *Genome Research* 21:1529–1542.  
764 doi:10.1101/gr.123158.111.
- 765 107. Shapiro MD, Domyan ET. (2013) Quick guide: Domestic Pigeons. *Current Biology*  
766 23:R302–R303. doi:10.1016/j.cub.2013.01.063.
- 767 108. Danecek P, Auton A, Abecasis G, et al. (2011) The variant call format and VCFtools.  
768 *Bioinformatics* 27:2156–2158. doi:10.1093/bioinformatics/btr330.
- 769 109. Camacho C, Coulouris G, Avagyan V, Ma N, Papadopoulos J, Bealer K, Madden TL.  
770 (2009) BLAST+: architecture and applications. *BMC Bioinformatics* 10:421.  
771 doi:10.1186/1471-2105-10-421.
- 772 110. Robinson JT, Thorvaldsdóttir H, Winckler W, Guttman M, Lander ES, Getz G, Mesirov  
773 JP. (2011) Integrative genomics viewer. *Nature Biotechnology* 29:24–26.

774           doi:10.1038/nbt.1754.

775    111. R Development Core Team. (2018) R: A language and environment for statistical

776           computing. In: R Foundation for Statistical Computing Statistical Computing.

777           <https://www.r-project.org>.

778

779

780 **FIGURES AND FIGURE LEGENDS**  
781

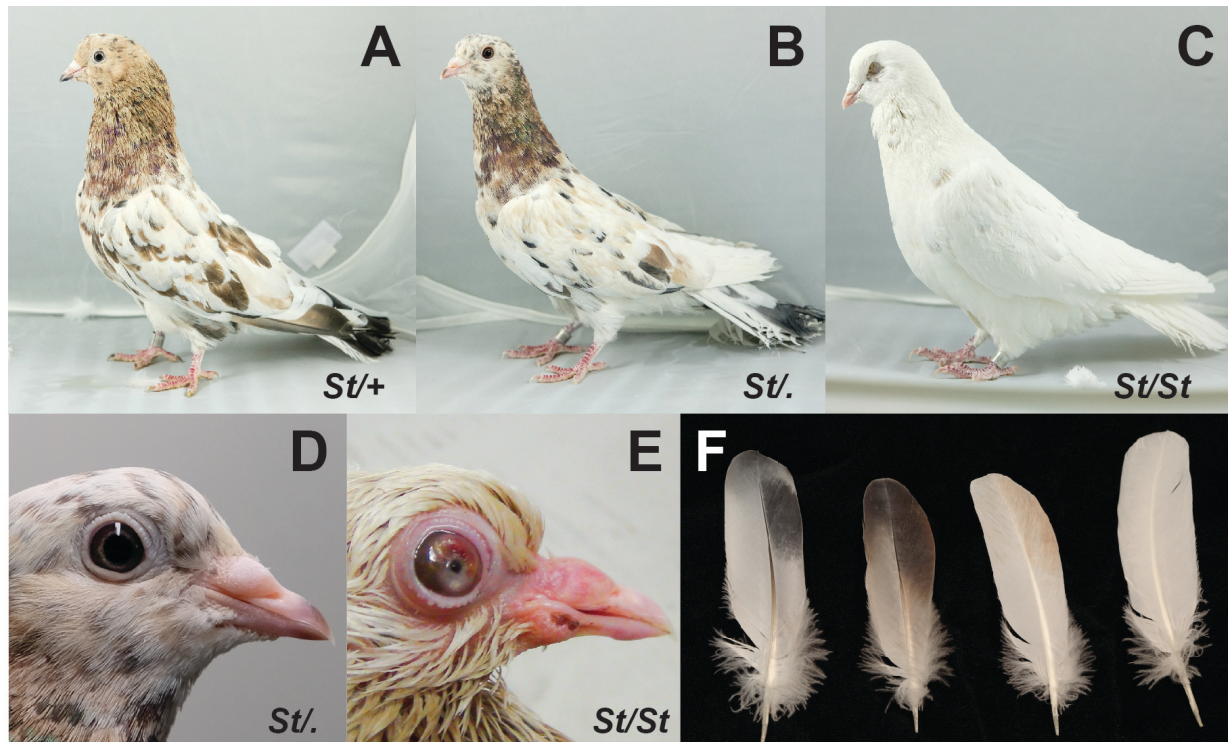

782 **Figure 1.** Phenotypes of pigeons carrying Almond alleles (*St*, Almond allele; +, wild type allele).  
783 (A) Heterozygous Almond male. (B) Hemizygous Almond female. (C) Homozygous Almond  
784 male. (D) Almond females have no observable eye defects. (E) Homozygous Almond males often  
785 show severe eye defects. Defects pictured in this juvenile include bloated eyelid and anterior  
786 opacity. (F) Wing feathers from different phenotypes, left to right: non-Almond, dark Almond,  
787 light Almond, homozygous Almond.

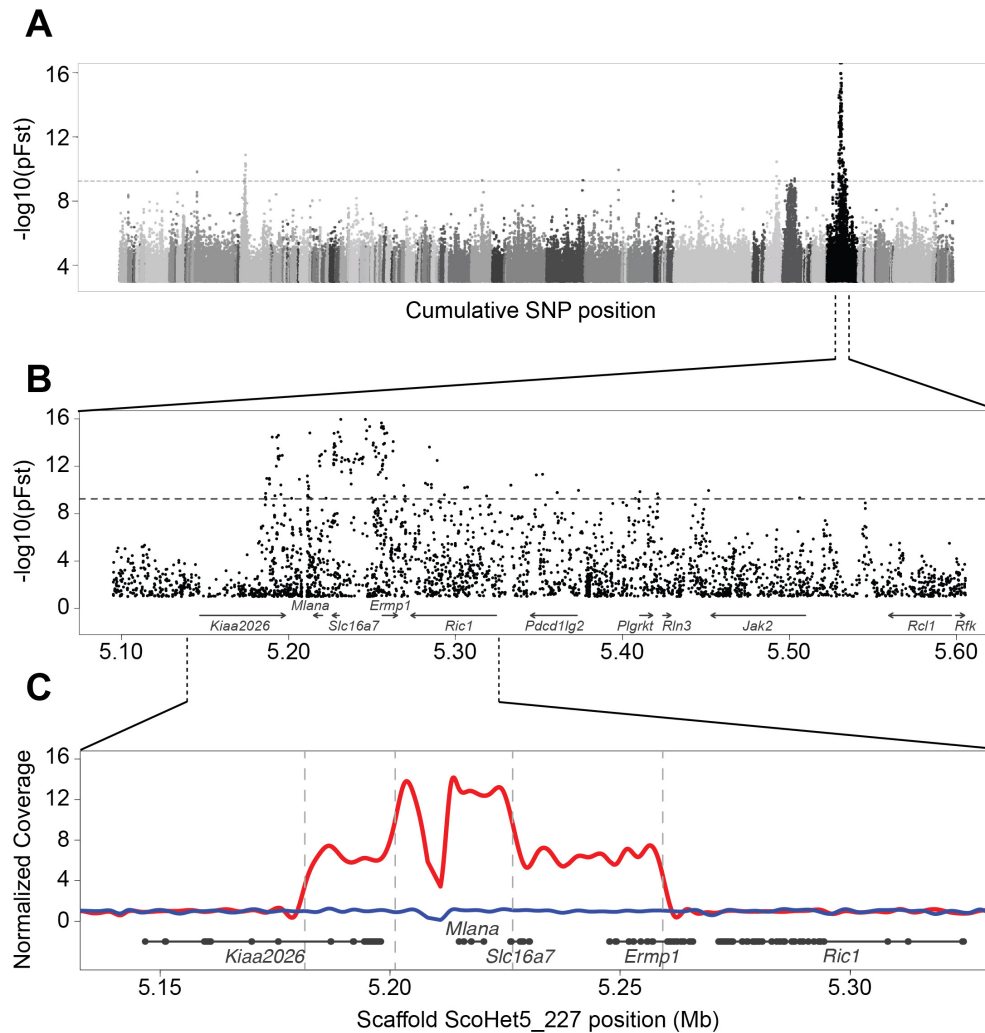

788  
789 **Figure 2.** Almond is associated with a CNV on a sex-linked genomic scaffold. (A) Whole-genome  
790 pFst comparisons between Almond and non-Almond pigeons. Each dot represents a SNP position,  
791 with shades of gray indicating different genomic scaffolds. The horizontal dashed grey line  
792 indicates genome-wide significance threshold. (B) Detail of pFst plot for candidate region on  
793 ScoHet5\_227, a sex-linked scaffold [104]. Gene models are depicted at the bottom of the plot. (C)  
794 Detail view of the CNV region. Solid red line represents the mean normalized read depth for 10  
795 female Almond birds in this region. The blue line is a single representative of non-Almond female  
796 coverage. Vertical dashed lines indicate positions of CNV breakpoints. Gene models are depicted  
797 below the coverage plot in grey (thick lines, exons; thin lines, introns).

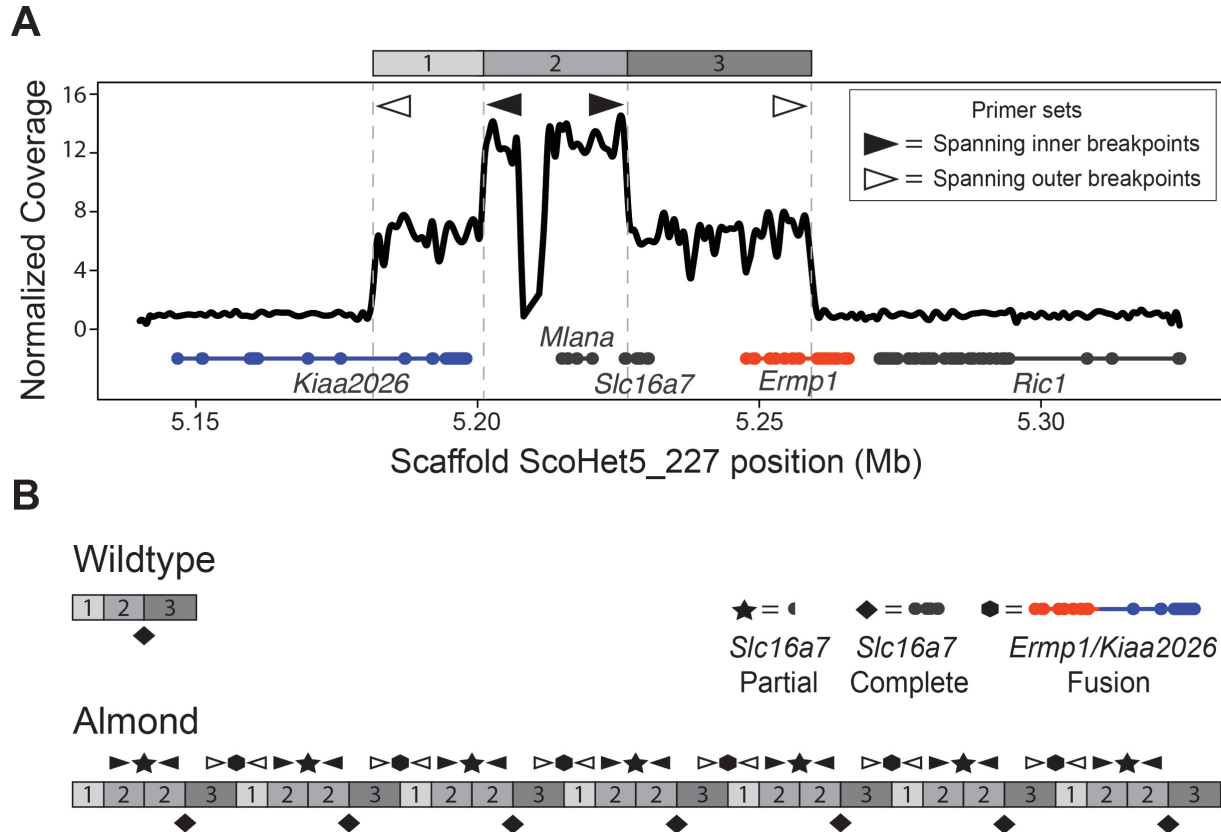

798  
 799 **Figure 3.** The Almond-associated CNV has a complex structure that results in duplicated,  
 800 truncated, and fused genes. (A) Coverage diagram showing different regions of the CNV  
 801 normalized to a non-CNV region on the same scaffold. Two outer regions (1 and 3, above plot)  
 802 have an approximately 7-fold coverage increase, while one inner region (2) has an approximately  
 803 14-fold coverage increase. Gene models are depicted below the coverage plot in grey, orange and  
 804 blue (thick lines, exons; thin lines, introns). (B) Schematic of the non-Almond (top) and inferred  
 805 Almond (bottom) structures of the CNV. Gene structural changes resulting from the Almond CNV  
 806 include a fusion of *Ermp1* and *Kiaa2026* at the segment 3/1 junction (hexagon), and a truncated  
 807 version of *Slc16a7* at the segment 2/2 junction (star). A complete copy of *Slc16a7* occurs at each  
 808 2/3 junction (diamond).  
 809

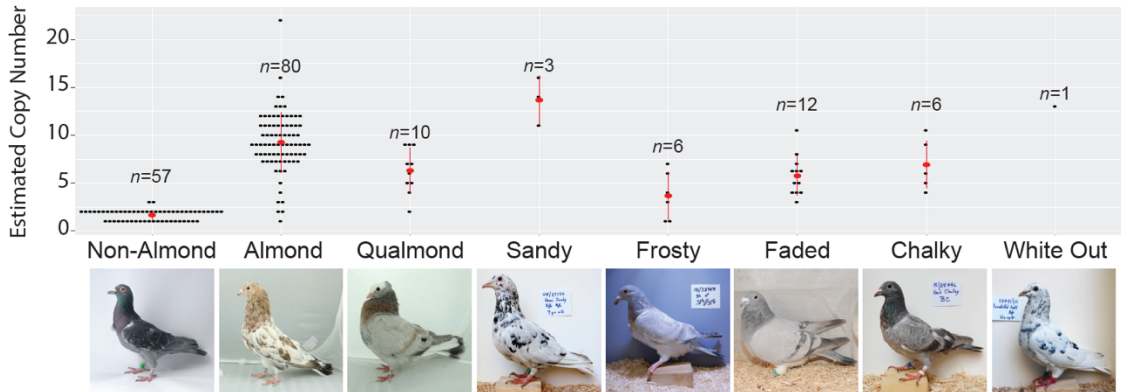

810  
811

812 **Figure 4.** *St*-linked pigmentation phenotypes show quantitative variation in the Almond CNV.

813 Black dots represent results of a TaqMan copy number assay. Mean copy numbers for each

814 phenotype are shown as red dots. Most individuals without *St*-linked phenotypes have the expected

815 1 or 2 copies (because *St* is a sex-linked locus, females have a minimum of 1 copy and males have

816 a minimum of 2). All other *St*-linked phenotypes are associated with an expansion of the CNV in

817 the Almond candidate region on scaffold ScoHet5\_227, indicating an allelic series at *St*. Numbers

818 above each phenotype indicate number of individuals sampled.

819

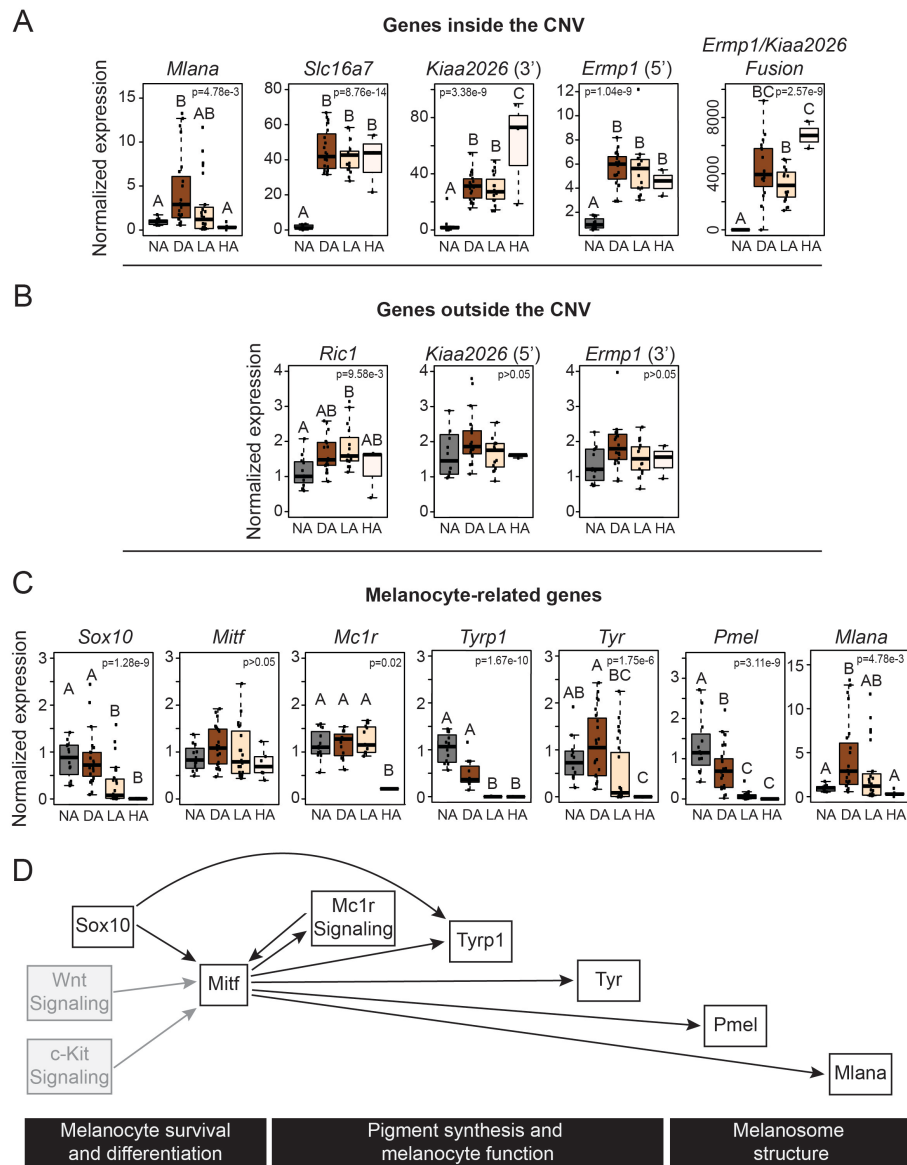

820

821 **Figure 5.** Almond and non-Almond feather buds have distinct gene expression profiles. (A) Exons  
 822 assayed within the CNV show expression differences in Almond feather buds compared to non-  
 823 Almond. Boxplots show the results of qRT-PCR assays designed to assess gene expression of  
 824 exons located in the CNV region. Fusion gene expression results are from qPCR primers spanning  
 825 exon 7 of *Ermp1* into exon 5 of *Kiaa2026*. (B) Exons assayed outside the CNV show no expression  
 826 differences in Almond feather buds compared to non-Almond. This indicates expression



827 differences are specific to exons inside the CNV. (C) Expression of melanocyte-related genes.  
828 qRT-PCR results indicate a decrease in expression of several genes involved in melanin production  
829 in Almond feather buds. (D) Model of interactions among genes and signaling pathways involved  
830 in different aspects of pigment synthesis. Gray boxes indicate pathways discussed in the text but  
831 not directly represented in our expression analyses. NA, feather buds from non-Almond  
832 individuals with wild type alleles at *St*; DA, dark Almond feather buds from hemizygous and  
833 heterozygous Almond individuals; LA, light Almond feather buds from hemizygous and  
834 heterozygous Almond individuals; HA, feather buds from a homozygous Almond individual. Bar  
835 in each box represents the median, box ends indicate upper and lower quartiles, whiskers indicate  
836 the highest and lowest value excluding outliers. Different letters indicate groups with statistically  
837 significant differences in gene expression determined by ANOVA and post-hoc Tukey test  
838 ( $p < 0.05$ ).

839

840 **SUPPORTING INFORMATION LEGEND**

841 **Supporting\_Information.xlsx.** S1-S5 Tables. Individual tables are separate worksheets within  
842 the file and contain the following information: S1, NCBI SRA submission numbers and breed  
843 information for birds used for genomic analysis in this study. S2, Sample sizes and Identifiers of  
844 birds included in each phenotypic category for qPCR analysis. S3, Raw qRT-PCR results for  
845 Figure 4. S4, Copy number results from Taqman assay of *Mlana* region. S5, Primer Sequences  
846 Used in This Study. S2:
